# Supplementary material
Source: PubMed Central journal article supplement (PMC3908661)
Supplement: NIHMS534363-supplement-Supplamentary_Material.pdf [file NIHMS534363-supplement-Supplamentary_Material.pdf]

1  
2  
3  
4  
5  
6  
7  
  
8  
9  
10  
11  
12  
13  
14  
15  
  
16  
17  
18

## SUPPLEMENTARY INFORMATION

### Non-invasive *in vivo* assessment of *IDH1* mutational status in glioma

Myriam M. Chaumeil<sup>1</sup>, Peder E.Z. Larson<sup>1</sup>, Hikari A.I. Yoshihara<sup>1</sup>, Olivia M. Danforth<sup>1</sup>,  
Daniel B. Vigneron<sup>1</sup>, Sarah J. Nelson<sup>1,2</sup>, Russell O. Pieper<sup>2,3</sup>, Joanna J. Phillips<sup>2,3,4</sup>,  
Sabrina M. Ronen<sup>1,2</sup>

<sup>1</sup> Department of Radiology and Biomedical Imaging, University of California San Francisco, 1700 4th Street San Francisco 94158, CA, USA

<sup>2</sup> Brain Tumor Research Center, University of California San Francisco, San Francisco, CA 94143, CA, USA

<sup>3</sup> Department of Neurological Surgery, Helen Diller Research center, University of California San Francisco, San Francisco, CA 94143, CA, USA

<sup>4</sup> Department of Pathology, Helen Diller Research center, University of California San Francisco, San Francisco, CA 94143, CA, USA

**Correspondence to:** Sabrina M. Ronen, Ph.D.  
E-mail: [sabrina.ronen@ucsf.edu](mailto:sabrina.ronen@ucsf.edu)

1 | **Supplementary Figures:**

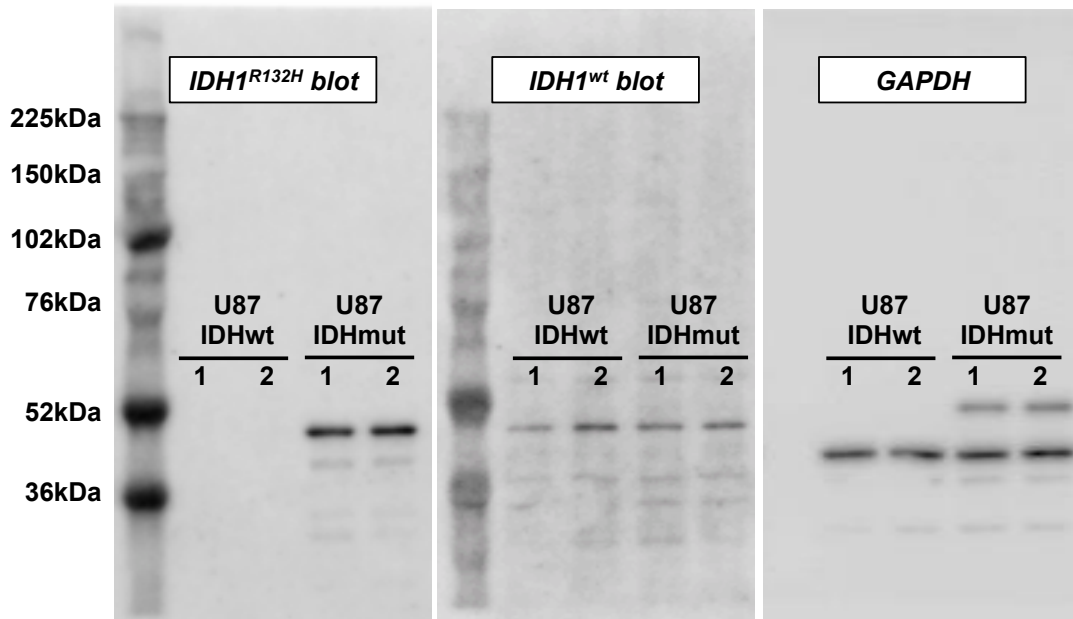

2 **Supplementary Figure S1 – Western-blotting confirms the presence of mutant**  
3 **IDH1<sup>R132H</sup> enzyme in U87IDHmut cells only.** Western-blotting for mutant IDH1  
4 (IDH1<sup>R132H</sup>, probed using a secondary anti-mouse antibody at  $\lambda=680\text{nm}$ , 46kDa, left) and  
5 wild-type IDH1 (IDH1wt, probed using a secondary anti-rabbit antibody at  $\lambda=800\text{nm}$ ,  
6 46kDa, middle) isoforms in U87IDHmut and U87IDHwt cells (n=2 per cell line per blot).  
7 GAPDH was used as a loading control (probed using a secondary anti-mouse antibody at  
8  $\lambda=680\text{nm}$ , 38kDa, n=2 per cell line per blot, right).

9

10
